# Supplementary material for: Mindfulness in the focus of the neurosciences - The contribution of neuroimaging to the understanding of mindfulness
Source: PubMed Central journal article supplement (PMC9622333; doi:10.3389/fnbeh.2022.928522), 2022-10-17
Supplement: Data_Sheet_1.pdf [file Data_Sheet_1.pdf]

## **Supplementary Material**

**Mindfulness in the focus of the neurosciences -**

**The contribution of neuroimaging to the understanding of  
mindfulness**

**Bruno J. Weder**

**Table ST1. Paper selection for the review**

**Table ST2. Scales measuring mindful traits and tendency to lapse into mind  
wandering**

**Table ST3. Synopsis of selected studies dealing with mindfulness**

**Table ST4. Coordinates of DMN constituents and insular zones involved -  
Supplementary Table for Figure 1**

**Table ST1. Paper selection for the review**

Search terms for selection of papers to include into the sections 2 to 6 of the paper which represent the basis for the final discussion “Deducing the neurobiological underpinnings of mindfulness from brain imaging – a conceptual approach”

Section 2. The quest for an operational definition of mindfulness – a semantic issue

Core elements of mindfulness, collateral features

Training, focused attention (FA) meditation, open monitoring (OM) meditation

Self-referential thinking, mind wandering, processes competing with mindfulness

Excluded: meditation forms beyond FA meditation and OM meditation

Section 3. Dimensions of mindfulness

First person perspective, the subject of experience, the metaphysical self, the “I”

Third person perspective, the phenomenal self, the “me”

Self-specifying processes, self-relational processes

Conceptual frameworks, relationship between mindfulness processing and neurobiological mechanisms

Attentional expertise, concentration meditation

Section 4. Dimensions of believing and interrelations with mindfulness

Believing as an example of self-referential processing

Interaction of mindfulness with believing

Competition of believing with mindfulness

5. Studying mindfulness with neuroimaging using MRI – concepts and technical aspects

Examining mindfulness using structural MRI, functional MRI

Resting state functional MRI

Default mode network, functional characteristics

Voxel-based morphometry, tensor-based morphometry

6. Neuroimaging studies of mindfulness – shaping the brain in parallel with the experience in mindfulness meditation

Naïve in meditation, experience in meditation, long-term meditation

Tasks for mindfulness, Tasks for mind wandering

Brain plasticity, experience in meditation, long-term meditation

Differentiated involvement of DMN, emotional control, mindful processing, narrative processing

Interoception, exteroception, insular cortex

Effortless attention, cortical control mechanisms

Long-term effects and working memory, and mind wandering

**Table ST2. Scales measuring mindful traits and tendency to lapse into mind wandering**

1. The Mindful attention Awareness Scale [MAAS] comprises 15 items related to daily self-perception and -control that express the single factor, mindfulness (Brown & Ryan, 2006). To focus on fundamental aspects, items containing attitudinal components like acceptance, motivational intent and potential consequences like calmness were excluded. The scores range between 1 and 6. Although they converged to those of various assessments of well-being, the correlations were at best moderate.
2. The Freiburg Mindfulness Inventory [FMI] comprises 30 items covering a common scale of mindfulness for individuals acquainted with meditation or 14 items in an abbreviated version that do not assume Buddhistic or meditative practice (Walach et al., 2006). The scores range between 1 and 4.
3. The Kentucky Inventory of Mindfulness Skills [KIMS] is a 12 item scale dealing with 4 factors: describe, observe, act with awareness and accept without judgement (Baer et al., 2004). The scores range between 1 and 5.
4. The Five Facet Mindfulness Questionnaire [FFMQ] merges items from various scales into 5 subscales describing: non-reactivity, 7 items; observing, 8 items; acting mindfully, 8 items; describing mindfulness, 8 items; and non-judging, 8 items (Baer et al., 2006). The scores range between 1 and 5. A discrepancy between these scales and the two component model of mindfulness was pointed out by Malinowski (Malinowski, 2008). Three out of the five items, e.g. “acting mindfully”, “describing mindfulness” and “non-reactivity” might entail semantic problems due to their dependence on the meditative experience of the examinee, i.e. control subjects, novices or masters might understand the items differently.
5. The Imaginal Processes Inventory comprises questions regarding concrete situations that favour lapse into day dreams or mind wandering. Part I, an abbreviated form, poses 24 questions, Part II, a comprehensive form, poses an additional 320 questions. The scores range between 1 and 5. The test subjects are instructed explicitly not to ponder the perspective of the situation.

**Table ST3. Synopsis of selected studies dealing with mindfulness**

| <i>Authors</i>           | <i>Group size</i><br><i>[n]</i> | <i>Age</i><br><i>[yrs]</i> | <i>Experience</i><br><i>in meditation.<sup>1</sup></i> | <i>Task</i> | <i>Context of the task</i>                    | <i>Mainly involved areas, MNI-coordinates</i>                                                            |
|--------------------------|---------------------------------|----------------------------|--------------------------------------------------------|-------------|-----------------------------------------------|----------------------------------------------------------------------------------------------------------|
| 1.Herwig et al. 2010     | 30                              | 23 - 41                    | 0                                                      | act-fMRI    | Introspection of emotion                      | SFG R (15,-10,57)<, AMG L (-26,-7,-15)>                                                                  |
| 2.Murakami et al. 2015   | 21                              | 20 -41                     | 0                                                      | act-fMRI    | Emotion regulation vs suppression             | dmPFC R (6,46,36) corr. to AMG L                                                                         |
| 3.Modinos et al. 2012    | 18                              | 20 -41                     | 0                                                      | act-fMRI    | Re-appraisal of neg. emotions                 | dmPFC R,L (6,34,54;-8,42,54) pos. corr. to KIMS                                                          |
| 4.Mason et al. 2007      | 19                              | not known                  | 0                                                      | rs-fMRI     | Daydreaming evoked by SIT                     | vmPFC L (-6,51 -9)<, PCC/Precuneus(2,44,-6)<                                                             |
| 5.Wang et al. 2014       | 245                             | 21.5(+1.5 s.d.)            | 0                                                      | s-MRI       | Bias to mind wandering                        | High connectivity between thalamus and PCC (6,-46,22)                                                    |
| 6.Murakami et al. 2012   | 19                              | 18 - 24                    | 0                                                      | s-MRI       | + corr. to describing item (FFQM)             | GM volume of AIC R(37,10,-15) and AMG L(13,-7,-13)                                                       |
| 7.Lu et al. 2014         | 247                             | 19 – 25                    | 0                                                      | s-MRI       | - corr. to mindful traits (MAAS)              | GM volume of PCC R,L(12,-44,38) and L OFC(-40,36,-4)                                                     |
| 8.Prakash et al. 2013    | 25                              | 60 - 75                    | 0                                                      | rs-fMRI     | + corr. to mindful traits (MAAS)              | FC dorsal PCC (-2,-24,38) to Precuneus(8,-56,36)                                                         |
| 9.Lebois et al. 2015     | 30                              | 18 - 25                    | 0                                                      | act-fMRI    | Immersion>mindful attention                   | vmPFC/OFC(0,24,-12) <                                                                                    |
|                          |                                 |                            |                                                        |             | Mindful attention>immersion                   | SFG/dmPFC L (-15,9,57)<, Angular G. L (-48,-57,39) <                                                     |
| 10.Wang et al., 2018     | 44                              | 19-29                      | 0                                                      | act-fMRI    | IC attention > EC attention                   | AIC R,L (34,20,4 and -30,20,8) <                                                                         |
| 11.Farb et al. 2007      | 16                              | 45.6(+13.4 s.d.)           | + vs ++                                                | act-fMRI    | Experiential vs narrative focus               | dmPFC(-12,56,40) >,vmPFC(8,68,8) > in MT-group                                                           |
| 12.Farb et al. 2012      | 16                              | 45.6(+13.4 s.d.)           | + vs ++                                                | act-fMRI    | Intero- vs. exteroceptive attention           | dmPFC (-3,27,51) interacts across conditions in MT-group                                                 |
| 13.Hasenkamp et al. 2012 | 24                              | 28 – 66                    | +++                                                    | act-fMRI    | Cycle from FA to MW to                        | dmPFC (1,41,14) > across conditions                                                                      |
| 14.Hasenkamp and B. 2012 | 24                              | 28 - 66                    | +++                                                    | act-fMRI    | Awareness to Shift back to MW                 | dIPFC R(42 32 34) during FA > during MW                                                                  |
| 15.Taylor et al. 2013    | 13                              | 46(+11 s.d.)               | + vs +++                                               | rs-fMRI     | Present-moment awareness                      | FC of dorsal mPFC(-10,57,19) to IPL(48,-56,27) rt <                                                      |
| 16.Brewer et al. 2011    | 12                              | not known                  | ++++                                                   | act-fMRI    | FA , choiceless awareness,<br>loving kindness | mPFC/ACC (-6,52,-2) > and PCC(-8-56,26) ><br>Co-activation of mPFC,PCC,dACC and dIPFC across meditations |
| 17.Luders et al. 2012    | 50                              | 24 - 71                    | ++++                                                   | s-MRI       | Long-term meditators                          | Gyrification in AIC<<                                                                                    |
| 18.Josipovic et al. 2012 | 22                              | 32 – 62                    | ++++                                                   | act-fMRI    | FA- versus NDA-meditation                     | Modulation bw. ex- and intrinsic system of the brain                                                     |

Legend: sMRI, structural MRI; rs- fMRI, functional MRI during resting state; act-fMRI, functional MRI during activation task.

<sup>1</sup> Experience in meditation: none, 0; novices, +; > 2 month of training, ++; >1 year of training +++; > 5 years of training, +++; dm dorsal medial, vm ventral medial, dl dorsal lateral SFG, Sup. Frontal Gyrus; dorsal or ventral mPFC, dorsal or ventral medial prefrontal cortex; dl PFC, dorsal lateral prefrontal cortex; GM, grey matter; PCC, posterior Cingulate Cortex; AIC, anterior Insular cortex; OFC, Orbito-Frontal Cortex; dACC, dorsal Anterior Cingulate Cortex; AMG, Amygdala; FA, Focused attention; MW, Mind wandering; SIT, stimulus induced thoughts; MT, Meditation; FFQM, MAAS, KIMS, see Mindfulness Scales; <, increase, > decrease, corr., correlation; FC, functional connectivity; IC, interoceptive; EC, exteroceptive

**Table ST4. Coordinates of DMN constituents and insular zones involved - supplementary Table for Figure 1**

|                                             | dmPFC    |           |           | vmPFC |    |     | PCC/<br>Precuneus |     |    |
|---------------------------------------------|----------|-----------|-----------|-------|----|-----|-------------------|-----|----|
|                                             | x        | y         | z         | x     | y  | z   | x                 | y   | z  |
| Herwig et al.,2016, feel>think              | 15       | -10       | 57        |       |    |     |                   |     |    |
| Herwig et al.,2016, think>feel              | -9       | 14        | 52        |       |    |     | -5                | -55 | 18 |
| Murakami,2015,observe(emotion)              | 6        | 46        | 36        |       |    |     |                   |     |    |
| Murakami,2015, suppress(emotion)            |          |           |           |       |    |     | -6                | 60  | 24 |
| Modinos,2012,Re-appraisal                   | R 6/L -8 | R 34/L 42 | R 54/L 44 |       |    |     |                   |     |    |
| Modinos,2012, Re-appraisal                  |          |           |           |       |    |     |                   |     |    |
| Mason et al.,2007, MW                       |          |           |           | -6    | 51 | -9  | -3                | -45 | 37 |
| Wang et al.,2014, Bias to MW                |          |           |           | 2     | 44 | -6  | 6                 | -46 | 22 |
| Murakami et al.,2012, corr.to FFQM          |          |           |           |       |    |     |                   |     |    |
| Lu et al.,2014, corr. to MAAS               |          |           |           |       |    |     | 12                | -44 | 38 |
| Prakash et al., 2013, corr. to MAAS         |          |           |           |       |    |     | -2                | -24 | 38 |
| Lebois et al.,2015, immersion               |          |           |           | 0     | 24 | -12 |                   |     |    |
| Lebois et al.,2015, mindful attention       | -15      | 9         | 57        |       |    |     |                   |     |    |
| Wang et al. 2019, IC vs EC                  |          |           |           |       |    |     |                   |     |    |
| Farb et al., 2007, EF vs. NF(novives)       | -4       | 64        | 16        |       |    |     | -8                | -52 | 28 |
| Farb et al., 2007, EF vs. NF(MT)            | -12      | 56        | 40        | 8     | 68 | 8   |                   |     |    |
| Farb et al. 2012, interoception (MT)        |          |           |           |       |    |     | -12               | -54 | 21 |
| Farb et al. 2012, exteroception (MT)        | -3       | 27        | 51        |       |    |     |                   |     |    |
| Hasenkamp et al., 2012, Shifting MW to FA   |          |           |           | 1     | 32 | -10 |                   |     |    |
| Hasenkamp & Barsalou,2012, maintaining FA   |          |           |           | -9    | 29 | -19 |                   |     |    |
| Taylor et al. 2013, to present moment aware | -10      | 57        | 19        | -2    | 47 | -10 | 8                 | -53 | 27 |
| Brewer et al., 2011, three meditation tasks |          |           |           | -6    | 52 | -2  | 8                 | -56 | 26 |
| Josipovic, 2012                             |          |           |           | 2     | 51 | 10  | 0                 | -31 | 29 |

Table S4 - continued

|                                             | Insula     |           |          | IPL        |             |           |
|---------------------------------------------|------------|-----------|----------|------------|-------------|-----------|
|                                             | x          | y         | z        | x          | y           | z         |
| Herwig et al.,2016, feel>think              |            |           |          |            |             |           |
| Herwig et al.,2016, think>feel              |            |           |          |            |             |           |
| Murakami,2015,observe(emotion)              | -38        | -6        | 16       |            |             |           |
| Murakami,2015, suppress(emotion)            |            |           |          | -42        | -66         | 36        |
| Modinos,2012,Re-appraisal                   |            |           |          | R 54/L -42 | R -54/L -66 | R 26/L 36 |
| Modinos,2012,Re-appraisal                   | R 47/L-36  | R 0/L -16 | R 4/L 17 |            |             |           |
| Mason et al.,2007, MW                       |            |           |          |            |             |           |
| Wang et al.,2014, Bias to MW                |            |           |          | R 48/L -42 | R -60/L -70 | R 30/L 34 |
| Murakami et al.,2012, corr.to FFQM          | 37         | -10       | -15      |            |             |           |
| Lu et al.,2014, corr. to MAAS               |            |           |          |            |             |           |
| Prakash et al., 2013, corr. To MAAS         |            |           |          |            |             |           |
| Lebois et al.,2015, immersion               |            |           |          | -45        | -54         | 51        |
| Lebois et al.,2015,mindful attention        | R 34/L -30 | R 20/L 20 | R 4/L 8  |            |             |           |
| Wang et al. 2019, IC vs EC                  |            |           |          |            |             |           |
| Farb et al., 2007, EF vs. NF (novices)      | 40         | -8        | 16       |            |             |           |
| Farb et al., 2007, EF vs. NF (MT)           | 33         | -6        | 15       |            |             |           |
| Farb et al. 2012, interoception (MT)        |            |           |          | 33         | -57         | 54        |
| Farb et al. 2012, exteroception (MT)        |            |           |          |            |             |           |
| Hasenkamp et al., 2012, Shifting MW to FA   |            |           |          |            |             |           |
| Hasenkamp & Barsalou, 2012, maintaining FA  |            |           |          | R 48/L -40 | R -56/L -67 | R 27/L 34 |
| Taylor et al. 2013, to pesent moment aware  |            |           |          | 54         | -36         | 45        |
| Brewer et al., 2011, three meditation tasks |            |           |          |            |             |           |
| Josipovic, 2012                             |            |           |          |            |             |           |

Legend: FA, Focused attention; MW, Mind wandering; SIT; MT, experienced in meditation; FFQM, MAAS, see Mindfulness Scales; corr., correlation; EF, experiential focus; NF, narrative focus; R, right; L, left; dmPFC, dorsal medial Prefrontal Cortex; vmPFC, ventral medial Prefrontal Cortex, PCC, Posterior Cingulate Cortex; IPL, Inferior Posterior Lobule
